# Supplementary material for: Dose–Response Association between Physical Activity and Health-Related Quality of Life in General Population: A Population-Based Pooled Study
Source: MDPI journal article supplement (doi:10.3390/healthcare10081460), 2022-08-03
Supplement: s1 [file s1]

## Supplementary Materials

Table S1 Physical activity questions used in the Welsh Health Survey.

| EXERCISE                                                                                                                                                                                                                                                                                                                                                              |                                                                                                                                                                                                                                                                                                                                                                                                                                                                                                                                            |                          |                          |                          |                          |                          |     |     |                          |                          |                          |                          |                          |                          |                          |    |    |    |    |    |    |    |
|-----------------------------------------------------------------------------------------------------------------------------------------------------------------------------------------------------------------------------------------------------------------------------------------------------------------------------------------------------------------------|--------------------------------------------------------------------------------------------------------------------------------------------------------------------------------------------------------------------------------------------------------------------------------------------------------------------------------------------------------------------------------------------------------------------------------------------------------------------------------------------------------------------------------------------|--------------------------|--------------------------|--------------------------|--------------------------|--------------------------|-----|-----|--------------------------|--------------------------|--------------------------|--------------------------|--------------------------|--------------------------|--------------------------|----|----|----|----|----|----|----|
| <p><b>43a</b> During the <b>7 days ending yesterday</b>, on which days did you do <b>LIGHT</b> exercise or physical activity for at least 30 minutes?<br/> <i>Blocks of activity lasting at least 10 minutes, which were done on the same day, can be counted towards the full 30 minutes.</i><br/> <b>Include physical activity which is part of your job</b></p>    |                                                                                                                                                                                                                                                                                                                                                                                                                                                                                                                                            |                          |                          |                          |                          |                          |     |     |                          |                          |                          |                          |                          |                          |                          |    |    |    |    |    |    |    |
| <p>exltnum...exltmon, exlttue, exltwed, exltthu, exltfri, exltsat, exltsun</p>                                                                                                                                                                                                                                                                                        |                                                                                                                                                                                                                                                                                                                                                                                                                                                                                                                                            |                          |                          |                          |                          |                          |     |     |                          |                          |                          |                          |                          |                          |                          |    |    |    |    |    |    |    |
| <p><b>Tick all days that apply</b></p>                                                                                                                                                                                                                                                                                                                                |                                                                                                                                                                                                                                                                                                                                                                                                                                                                                                                                            |                          |                          |                          |                          |                          |     |     |                          |                          |                          |                          |                          |                          |                          |    |    |    |    |    |    |    |
| <p><b>Light exercise / activity</b></p> <p><i>For example</i> Housework (eg Hoovering, dusting), walking at an average pace, golf, light gardening (eg weeding)</p>                                                                                                                                                                                                   | <table border="1"> <thead> <tr> <th>Mon</th> <th>Tue</th> <th>Wed</th> <th>Thu</th> <th>Fri</th> <th>Sat</th> <th>Sun</th> </tr> </thead> <tbody> <tr> <td><input type="checkbox"/></td> </tr> <tr> <td>01</td> <td>02</td> <td>03</td> <td>04</td> <td>05</td> <td>06</td> <td>07</td> </tr> </tbody> </table> <p>2451-64</p> | Mon                      | Tue                      | Wed                      | Thu                      | Fri                      | Sat | Sun | <input type="checkbox"/> | 01 | 02 | 03 | 04 | 05 | 06 | 07 |
| Mon                                                                                                                                                                                                                                                                                                                                                                   | Tue                                                                                                                                                                                                                                                                                                                                                                                                                                                                                                                                        | Wed                      | Thu                      | Fri                      | Sat                      | Sun                      |     |     |                          |                          |                          |                          |                          |                          |                          |    |    |    |    |    |    |    |
| <input type="checkbox"/>                                                                                                                                                                                                                                                                                                                                              | <input type="checkbox"/>                                                                                                                                                                                                                                                                                                                                                                                                                                                                                                                   | <input type="checkbox"/> | <input type="checkbox"/> | <input type="checkbox"/> | <input type="checkbox"/> | <input type="checkbox"/> |     |     |                          |                          |                          |                          |                          |                          |                          |    |    |    |    |    |    |    |
| 01                                                                                                                                                                                                                                                                                                                                                                    | 02                                                                                                                                                                                                                                                                                                                                                                                                                                                                                                                                         | 03                       | 04                       | 05                       | 06                       | 07                       |     |     |                          |                          |                          |                          |                          |                          |                          |    |    |    |    |    |    |    |
| <p>If no light exercise in the last 7 days, please tick</p>                                                                                                                                                                                                                                                                                                           | <p><input type="checkbox"/> 08 <b>exltno</b></p>                                                                                                                                                                                                                                                                                                                                                                                                                                                                                           |                          |                          |                          |                          |                          |     |     |                          |                          |                          |                          |                          |                          |                          |    |    |    |    |    |    |    |
| <p><b>43b</b> During the <b>7 days ending yesterday</b>, on which days did you do <b>MODERATE</b> exercise or physical activity for at least 30 minutes?<br/> <i>Blocks of activity lasting at least 10 minutes, which were done on the same day, can be counted towards the full 30 minutes.</i><br/> <b>Include physical activity which is part of your job</b></p> |                                                                                                                                                                                                                                                                                                                                                                                                                                                                                                                                            |                          |                          |                          |                          |                          |     |     |                          |                          |                          |                          |                          |                          |                          |    |    |    |    |    |    |    |
| <p>exmodnum...exmodmon, exmodtue, exmodwed, exmodthu, exmodfri, exmodsat, exmodsun</p>                                                                                                                                                                                                                                                                                |                                                                                                                                                                                                                                                                                                                                                                                                                                                                                                                                            |                          |                          |                          |                          |                          |     |     |                          |                          |                          |                          |                          |                          |                          |    |    |    |    |    |    |    |
| <p><b>Tick all days that apply</b></p>                                                                                                                                                                                                                                                                                                                                |                                                                                                                                                                                                                                                                                                                                                                                                                                                                                                                                            |                          |                          |                          |                          |                          |     |     |                          |                          |                          |                          |                          |                          |                          |    |    |    |    |    |    |    |
| <p><b>Moderate exercise / activity</b></p> <p><i>For example</i> Heavy housework (eg spring cleaning, walking with heavy shopping), fast walking, dancing, gentle swimming, heavy gardening (eg digging)</p>                                                                                                                                                          | <table border="1"> <thead> <tr> <th>Mon</th> <th>Tue</th> <th>Wed</th> <th>Thu</th> <th>Fri</th> <th>Sat</th> <th>Sun</th> </tr> </thead> <tbody> <tr> <td><input type="checkbox"/></td> </tr> <tr> <td>01</td> <td>02</td> <td>03</td> <td>04</td> <td>05</td> <td>06</td> <td>07</td> </tr> </tbody> </table> <p>2465-78</p> | Mon                      | Tue                      | Wed                      | Thu                      | Fri                      | Sat | Sun | <input type="checkbox"/> | 01 | 02 | 03 | 04 | 05 | 06 | 07 |
| Mon                                                                                                                                                                                                                                                                                                                                                                   | Tue                                                                                                                                                                                                                                                                                                                                                                                                                                                                                                                                        | Wed                      | Thu                      | Fri                      | Sat                      | Sun                      |     |     |                          |                          |                          |                          |                          |                          |                          |    |    |    |    |    |    |    |
| <input type="checkbox"/>                                                                                                                                                                                                                                                                                                                                              | <input type="checkbox"/>                                                                                                                                                                                                                                                                                                                                                                                                                                                                                                                   | <input type="checkbox"/> | <input type="checkbox"/> | <input type="checkbox"/> | <input type="checkbox"/> | <input type="checkbox"/> |     |     |                          |                          |                          |                          |                          |                          |                          |    |    |    |    |    |    |    |
| 01                                                                                                                                                                                                                                                                                                                                                                    | 02                                                                                                                                                                                                                                                                                                                                                                                                                                                                                                                                         | 03                       | 04                       | 05                       | 06                       | 07                       |     |     |                          |                          |                          |                          |                          |                          |                          |    |    |    |    |    |    |    |
| <p>If no moderate exercise in the last 7 days, please tick</p>                                                                                                                                                                                                                                                                                                        | <p><input type="checkbox"/> 08 <b>exmodno</b></p>                                                                                                                                                                                                                                                                                                                                                                                                                                                                                          |                          |                          |                          |                          |                          |     |     |                          |                          |                          |                          |                          |                          |                          |    |    |    |    |    |    |    |
| <p><b>43c</b> During the <b>7 days ending yesterday</b>, on which days did you do <b>VIGOROUS</b> exercise or physical activity for at least 30 minutes?<br/> <i>Blocks of activity lasting at least 10 minutes, which were done on the same day, can be counted towards the full 30 minutes.</i><br/> <b>Include physical activity which is part of your job</b></p> |                                                                                                                                                                                                                                                                                                                                                                                                                                                                                                                                            |                          |                          |                          |                          |                          |     |     |                          |                          |                          |                          |                          |                          |                          |    |    |    |    |    |    |    |
| <p>exvignum...exvigmon, exvigtue, exvigwed, exvigthu, exvigfri, exvigsat, exvigsun</p>                                                                                                                                                                                                                                                                                |                                                                                                                                                                                                                                                                                                                                                                                                                                                                                                                                            |                          |                          |                          |                          |                          |     |     |                          |                          |                          |                          |                          |                          |                          |    |    |    |    |    |    |    |
| <p><b>Tick all days that apply</b></p>                                                                                                                                                                                                                                                                                                                                |                                                                                                                                                                                                                                                                                                                                                                                                                                                                                                                                            |                          |                          |                          |                          |                          |     |     |                          |                          |                          |                          |                          |                          |                          |    |    |    |    |    |    |    |
| <p><b>Vigorous exercise / activity</b></p> <p><i>For example</i> Running, jogging, squash, swimming lengths, aerobics, fast cycling, football</p>                                                                                                                                                                                                                     | <table border="1"> <thead> <tr> <th>Mon</th> <th>Tue</th> <th>Wed</th> <th>Thu</th> <th>Fri</th> <th>Sat</th> <th>Sun</th> </tr> </thead> <tbody> <tr> <td><input type="checkbox"/></td> </tr> <tr> <td>01</td> <td>02</td> <td>03</td> <td>04</td> <td>05</td> <td>06</td> <td>07</td> </tr> </tbody> </table> <p>2479-92</p> | Mon                      | Tue                      | Wed                      | Thu                      | Fri                      | Sat | Sun | <input type="checkbox"/> | 01 | 02 | 03 | 04 | 05 | 06 | 07 |
| Mon                                                                                                                                                                                                                                                                                                                                                                   | Tue                                                                                                                                                                                                                                                                                                                                                                                                                                                                                                                                        | Wed                      | Thu                      | Fri                      | Sat                      | Sun                      |     |     |                          |                          |                          |                          |                          |                          |                          |    |    |    |    |    |    |    |
| <input type="checkbox"/>                                                                                                                                                                                                                                                                                                                                              | <input type="checkbox"/>                                                                                                                                                                                                                                                                                                                                                                                                                                                                                                                   | <input type="checkbox"/> | <input type="checkbox"/> | <input type="checkbox"/> | <input type="checkbox"/> | <input type="checkbox"/> |     |     |                          |                          |                          |                          |                          |                          |                          |    |    |    |    |    |    |    |
| 01                                                                                                                                                                                                                                                                                                                                                                    | 02                                                                                                                                                                                                                                                                                                                                                                                                                                                                                                                                         | 03                       | 04                       | 05                       | 06                       | 07                       |     |     |                          |                          |                          |                          |                          |                          |                          |    |    |    |    |    |    |    |
| <p>If no vigorous exercise in the last 7 days, please tick</p>                                                                                                                                                                                                                                                                                                        | <p><input type="checkbox"/> 08 <b>exvigno</b></p>                                                                                                                                                                                                                                                                                                                                                                                                                                                                                          |                          |                          |                          |                          |                          |     |     |                          |                          |                          |                          |                          |                          |                          |    |    |    |    |    |    |    |

**Table S2.** Missing data in the demographic variables.

| Characteristics                      | Total No. (%) | Missing data No. (%) |
|--------------------------------------|---------------|----------------------|
| Age (years)                          | 74,578 (100)  | 0 (0)                |
| Gender                               | 74,578 (100)  | 0 (0)                |
| BMI, kg/m <sup>2</sup>               | 68,538 (91.9) | 6040 (8.1)           |
| Smoking status                       | 73,527 (98.6) | 1051 (1.4)           |
| Highest level of education           | 69,264 (92.9) | 5314 (7.1)           |
| Employment status                    | 71,303 (95.6) | 3275 (4.4)           |
| Prevalent chronic illness            | 73,218 (98.2) | 1360 (1.8)           |
| Prevalent mental illness             | 71,532 (95.9) | 3046 (4.1)           |
| Prevalent musculoskeletal disorder   | 71,254 (95.5) | 3324 (4.5)           |
| Abbreviations: BMI, body mass index. |               |                      |

**Table S3.** Multivariable-adjusted means of HRQoL by MVPA volume, stratified by sex and age.

|                    | Predicted marginal mean of HRQoL (95% CI) <sup>a</sup> | Coefficient (95% CI) <sup>a</sup> |
|--------------------|--------------------------------------------------------|-----------------------------------|
| <b>Sex</b>         |                                                        |                                   |
| <b>Male</b>        |                                                        |                                   |
| None               | 73.81 (73.47-74.16)                                    | Referent                          |
| Very low           | 78.85 (78.16-79.54)                                    | 5.04 (4.27-5.80)                  |
| Low                | 80.08 (79.49-80.67)                                    | 6.27 (5.58-6.95)                  |
| Sufficient         | 80.67 (80.20-81.13)                                    | 6.85 (6.25-7.45)                  |
| High               | 80.23 (79.62-80.84)                                    | 6.42 (5.68-7.15)                  |
| Very high          | 81.16 (80.74-81.58)                                    | 7.35 (6.74-7.95)                  |
| Trend p value      |                                                        | <0.001                            |
| <b>Female</b>      |                                                        |                                   |
| None               | 69.73 (69.40-70.06)                                    | Referent                          |
| Very low           | 75.58 (74.96-76.19)                                    | 5.85 (5.14-6.55)                  |
| Low                | 76.21 (75.66-76.75)                                    | 6.48 (5.82-7.13)                  |
| Sufficient         | 77.36 (76.91-77.81)                                    | 7.63 (7.04-8.22)                  |
| High               | 77.36 (76.64-78.09)                                    | 7.63 (6.81-8.46)                  |
| Very high          | 78.11 (77.58-78.63)                                    | 8.38 (7.70-9.05)                  |
| Trend p value      |                                                        | <0.001                            |
| <b>Age (years)</b> |                                                        |                                   |
| <b>20-39</b>       |                                                        |                                   |
| None               | 77.68 (77.22-78.13)                                    | Referent                          |
| Very low           | 80.24 (79.53-80.95)                                    | 2.56 (1.74-3.39)                  |
| Low                | 81.31 (80.70-81.93)                                    | 3.63 (2.87-4.40)                  |
| Sufficient         | 82.29 (81.82-82.77)                                    | 4.62 (3.94-5.30)                  |
| High               | 81.89 (81.19-82.59)                                    | 4.21 (3.34-5.08)                  |
| Very high          | 83.52 (83.01-84.04)                                    | 5.84 (5.08-6.60)                  |
| Trend p value      |                                                        | <0.001                            |
| <b>40-59</b>       |                                                        |                                   |
| None               | 71.86 (71.45-72.26)                                    | Referent                          |
| Very low           | 77.20 (76.47-77.94)                                    | 5.35 (4.51-6.18)                  |
| Low                | 78.25 (77.62-78.88)                                    | 6.39 (5.63-7.15)                  |

|               |                     |                  |
|---------------|---------------------|------------------|
| Sufficient    | 79.20 (78.68-79.72) | 7.35 (6.66-8.03) |
| High          | 78.69 (77.96-79.42) | 6.84 (5.97-7.71) |
| Very high     | 79.60 (79.08-80.12) | 7.74 (7.02-8.47) |
| Trend p value |                     | <0.001           |

|               |                     |                    |
|---------------|---------------------|--------------------|
| <b>≥ 60</b>   |                     |                    |
| None          | 65.27 (64.87-65.68) | Referent           |
| Very low      | 73.12 (72.14-74.11) | 7.85 (6.78-8.93)   |
| Low           | 73.61 (72.75-74.48) | 8.34 (7.36-9.32)   |
| Sufficient    | 75.01 (74.28-75.74) | 9.74 (8.87-10.60)  |
| High          | 75.86 (74.72-77.01) | 10.59 (9.35-11.84) |
| Very high     | 75.50 (74.75-76.25) | 10.23 (9.32-11.14) |
| Trend p value |                     | <0.001             |

Abbreviations: CIs, confidence intervals; HRQoL, health-related quality of life; MVPA, moderate- to vigorous-intensity physical activity.

Scale range for HRQoL and each SF-36 domain: 0-100, higher scores indicative of better status or health.

None: not reporting any MVPA; Very low: reporting > 0 – <90 min/week; Low: reporting ≥ 90 – <150 min/week; Sufficient: reporting 150 - <300 min/week; High: reporting ≥300 - <390; Very high: reporting ≥390).

<sup>a</sup> The model was adjusted for age, sex, body mass index, education, employment, smoking status, mental illness, musculoskeletal disorder, chronic illness (including any heart and respiratory conditions, diabetes and cancer) and light-intensity physical activity.
